# Supplementary material for: Prognostic factors for recovery of health status after injury: a prospective multicentre cohort study
Source: PubMed Central journal article supplement — BMJ Open. 2021 Jan 6;11(1):e038707. doi: 10.1136/bmjopen-2020-038707 (PMC7789437; doi:10.1136/bmjopen-2020-038707), 2021-01-06
Supplement: bmjopen-2020-038707supp001.pdf [file bmjopen-2020-038707supp001.pdf]

**S1 Table.** Injury group classification of the most common types of injury, based on the Abbreviated Injury Score<sup>22</sup>.

| Type of trauma                           | First three numbers of the AIS-code | Injury severity (.1=minor, .6=maximal) |
|------------------------------------------|-------------------------------------|----------------------------------------|
| Pelvic injury                            | 856                                 | .2, .3, .4, .5                         |
| Hip fracture                             | 853                                 | .3                                     |
| Tibia, complex foot or femur fracture    | 854                                 | .2                                     |
|                                          | 857                                 | .2                                     |
|                                          | 858                                 | .2                                     |
| Shoulder and upper arm injury            | 770                                 | .1, .2                                 |
|                                          | 771                                 | .1, .2                                 |
|                                          | 750                                 | .2                                     |
|                                          | 751                                 | .2                                     |
| Radius, ulna or hand fracture            | 752                                 | .1, .2, .3                             |
|                                          | 753                                 | .2                                     |
| Mild TBI*                                | 110                                 | .1, .2                                 |
|                                          | 140                                 | .2                                     |
|                                          | 161                                 | .1, .2                                 |
| Severe TBI**                             | 110                                 | .3                                     |
|                                          | 140                                 | .3, .4, .5, .6                         |
|                                          | 161                                 | .3, .4, .5                             |
| Facial fracture                          | 250                                 | .1, .2, .3                             |
|                                          | 251                                 | .1, .2, .3                             |
| Thoracic injury                          | 441                                 | .1, .2, .3, .4, .5                     |
|                                          | 419                                 | .2, .3, .4, .5                         |
|                                          | 442                                 | .2, .3, .4, .5                         |
| Rib fracture                             | 450                                 | .1, .2, .3, .4                         |
| Mild abdominal injury                    | 516                                 | .1, .2                                 |
|                                          | 510                                 | .1, .2                                 |
|                                          | 521                                 | .2                                     |
|                                          | 530                                 | .1                                     |
|                                          | 540                                 | .1, .2                                 |
|                                          | 541                                 | .2                                     |
|                                          | 542                                 | .1, .2                                 |
|                                          | 543                                 | .1, .2                                 |
|                                          | 544                                 | .1, .2                                 |
|                                          | 545                                 | .1, .2                                 |
| Severe abdominal injury                  | 516                                 | .3                                     |
|                                          | 510                                 | .3                                     |
|                                          | 520                                 | .3                                     |
|                                          | 520                                 | .4, .5                                 |
|                                          | 521                                 | .3, .4                                 |
|                                          | 540                                 | .3, .4                                 |
|                                          | 541                                 | .3, .4, .5                             |
|                                          | 542                                 | .3, .4, .5                             |
|                                          | 543                                 | .3, .4, .5                             |
|                                          | 544                                 | .3, .4, .5                             |
| 545                                      | .3, .4, .5                          |                                        |
| Spinal cord injury                       | 640                                 | 3, .4, .5                              |
| Stable vertebral fracture or disc injury | 650                                 | .2, .3                                 |

Abbreviations: AIS, Abbreviated Injury Score; TBI, traumatic brain injury.

\* Concussion/ commotio cerebri, sequelae of intracranial injury. Sequelae of injury classifiable to S06.

\*\* Traumatic cerebral oedema, focal brain injury, epidural haemorrhage, traumatic subdural haemorrhage, traumatic subarachnoid haemorrhage, intercranial injury unspecified, crushing injury of face, crushing injury of skull, crushing injury of other parts of head, crushing injury of head part unspecified, diffuse brain injury, intracranial injury with prolonged coma, other intracranial injuries traumatic haemorrhage (cerebellar/intracranial not specified).
